# Supplementary material
Source: publisher site journal article supplement (https://www.dovepress.com/article/437190)
Supplement: Supplementary file 1 [file get_supplementary_file.php]

## Supplemental appendix

Supplementary Figure 1. Study design

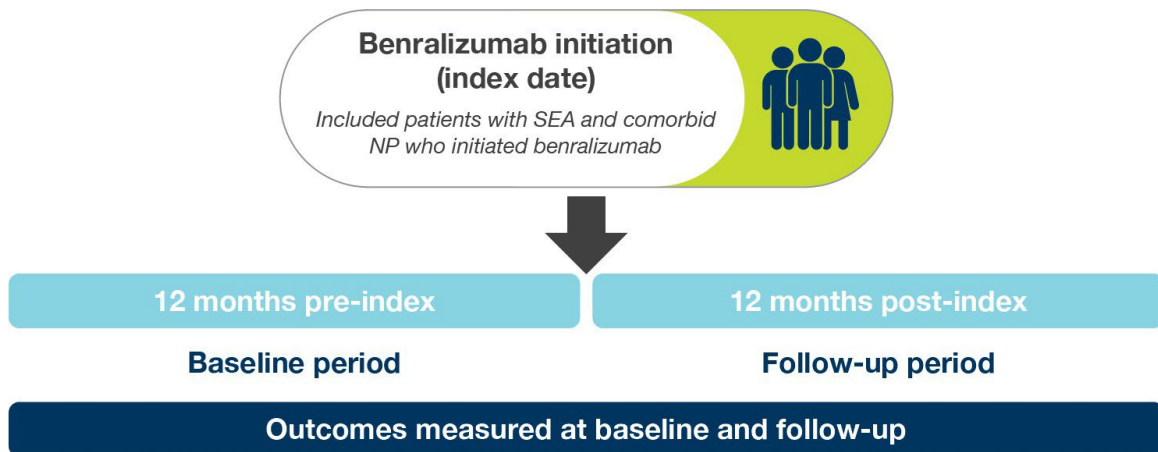

NP, nasal polyps; SEA, severe eosinophilic asthma.

**Supplementary Table 1.** Collaborators (RANS Principal Investigators and Investigators)

| <b>Principal investigators</b> |                                 |
|--------------------------------|---------------------------------|
| France                         | Gilles Devouassoux              |
|                                | Arnaud Bourdin                  |
| Germany                        | Ludger Klimek                   |
| Italy                          | Girolamo Pelaia                 |
|                                | Stefania Gallo                  |
|                                | Jan Walter Schroeder            |
|                                | Massimo Triggiani               |
|                                | Salvatore Lombardo              |
|                                | Bianca Beghe                    |
| Japan                          | Raffaele Campisi                |
|                                | Sachio Takeno                   |
| Spain                          | Akira Yamasaki                  |
|                                | Maria Gil                       |
|                                | Rafael Hijano                   |
|                                | Eva Martinez-Moragon            |
|                                | Juan Maza-Solano                |
|                                | Ana Rosado Ingelmo              |
|                                | Julio Delgado Romero            |
|                                | Manuel Jorge Rial Prado         |
|                                | Irina Bobolea                   |
| Javier Domínguez-Ortega        |                                 |
| USA                            | Michael E Wechsler              |
|                                | Li-Xing Man                     |
|                                | Joseph Han                      |
|                                | Robert Lin                      |
|                                | Alfred Illoreta Jr.             |
| <b>Investigators</b>           |                                 |
| Italy                          | Annamaria Bosi                  |
|                                | Simone Rizzato                  |
|                                | Davide Celsi                    |
|                                | Martina Liuzzi                  |
|                                | Andrea Toniato                  |
| Japan                          | Takashi Ishino                  |
|                                | Hiroshi Iwamoto                 |
|                                | Naoko Higaki                    |
| Spain                          | Leticia de las Vecillas Sánchez |
|                                | Magdalena Lluch                 |
| USA                            | Paul D. Allen                   |
|                                | Maura Campbell                  |
|                                | Isaac L. Schmale                |

**Supplementary Table 2.** Approving IRB and ethics committees

| Country | Organization                                               | IRB and ethics committees' name                                                                                                      |
|---------|------------------------------------------------------------|--------------------------------------------------------------------------------------------------------------------------------------|
| France  | Hôpital de la Croix Rousse                                 | Notification to Health Data Hub was required (registration number: 2021-A02475-36)                                                   |
|         | CHU Montpellier - Hôpital Arnaud de Villeneuve             |                                                                                                                                      |
|         | Assistance Publique Hopitaux de Marseille - Hospital Nord  |                                                                                                                                      |
| Italy   | AOU Renato Dulbecco                                        | Comitato Etico Regione Calabria Sez. Area Centro                                                                                     |
|         | ASST Sette Laghi                                           | Comitato Etico dell'Insubria/ the Insubria Ethics Committee                                                                          |
|         | ASST Grande Ospedale Metropolitano Niguarda                | COMITATO ETICO AREA 3                                                                                                                |
|         | Azienda Ospedaliero Universitaria Careggi                  | COMITATO ETICO REGIONE TOSCANA – AREA VASTA SUD EST                                                                                  |
|         | A.O.U. San Giovanni di Dio Ruggi d'Aragona                 | COMITATO ETICO CAMPANIA SUD                                                                                                          |
|         | A.O.U. Policlinico di Modena                               | COMITATO ETICO DELL'AREA VASTA EMILIA NORD                                                                                           |
|         | AORN Ospedali dei Colli -A.O. MONALDI                      | Comitato Etico Università degli Studi della Campania “Luigi Vanvitelli”                                                              |
|         | Hematology Sapienza University                             | the Comitato Etico dell’Università Sapienza                                                                                          |
|         | POLICLINICO UNIVERSITARIO PRESIDIO DI MONSERRATO           | Comitato Etico Azienda Ospedaliero Universitaria di Cagliari/the Independent Ethics Committee of the Azienda Ospedaliero di Cagliari |
|         | A.O.U. Policlinico V. Emanuele - Presidio Gaspare Rodolico | Comitato etico Catania 1                                                                                                             |
| Japan   | Niigata University Medical and Dental Hospital             | Ethical Committee for Epidemiology of Hiroshima University                                                                           |
|         | Hiroshima University Hospital                              |                                                                                                                                      |
|         | Kansai Medical University Medical Center                   |                                                                                                                                      |
|         | Nagaoka Red Cross Hospital                                 |                                                                                                                                      |
|         | Tottori University Hospital                                |                                                                                                                                      |
|         | Showa University Hospital                                  |                                                                                                                                      |

|                                               |                                                    |                                                                                                                                                                                   |
|-----------------------------------------------|----------------------------------------------------|-----------------------------------------------------------------------------------------------------------------------------------------------------------------------------------|
| Spain                                         | Hospital Universitario 12 de Octubre               | COMITÉ DE ÉTICA DE LA INVESTIGACIÓN CON MEDICAMENTOS (CEIM) del HOSPITAL UNIVERSITARIO 12 DE OCTUBRE/ the Clinical Research Ethics Committee of 12 de Octubre University Hospital |
|                                               | Hospital del Mar                                   |                                                                                                                                                                                   |
|                                               | Hospital Universitario Dr Peset                    |                                                                                                                                                                                   |
|                                               | Hospital Universitario Virgen Macarena             |                                                                                                                                                                                   |
|                                               | Hospital Arnau de Vilanova de Valencia             |                                                                                                                                                                                   |
|                                               | Hospital de Especialidades de Jerez de la Frontera |                                                                                                                                                                                   |
|                                               | Hospital Clínico Universitario de Salamanca        |                                                                                                                                                                                   |
|                                               | Hospital Universitario Fundación de Alcorcón       |                                                                                                                                                                                   |
|                                               | Hospital Universitario Virgen Macarena             |                                                                                                                                                                                   |
|                                               | Complejo Hospitalario Universitario A Coruña       |                                                                                                                                                                                   |
|                                               | Hospital Clínic Barcelona                          |                                                                                                                                                                                   |
|                                               | Hospital Universitario La Paz                      |                                                                                                                                                                                   |
|                                               | United States of America                           |                                                                                                                                                                                   |
| University of Rochester Medical Center        |                                                    |                                                                                                                                                                                   |
| Eastern Virginia Med. School, Norfolk         |                                                    |                                                                                                                                                                                   |
| IMMUNOe Research Centers                      |                                                    |                                                                                                                                                                                   |
| New York Allergy And Sinus Centers - Glendale |                                                    |                                                                                                                                                                                   |
| Mount Sinai                                   |                                                    |                                                                                                                                                                                   |

**Supplementary Table 3.** Systemic corticosteroid use at baseline (12-month pre-index period) and follow-up period after benralizumab initiation

| Treatment                                               | Baseline                   | Follow-up (up to 12 months) |
|---------------------------------------------------------|----------------------------|-----------------------------|
| <b>SCS use for asthma only</b>                          |                            |                             |
| SCS, n/N (%)                                            | 95/233 (40.8)              | 28/233 (12.0)               |
|                                                         | n=91                       | n=28                        |
| Number of SCS courses <sup>a</sup> , mean (SD)          | 2.4 (2.4)                  | 2.5 (2.4)                   |
| Total daily dose (mg) <sup>a</sup> , mean (SD)          | n doses=215<br>29.7 (37.1) | n doses=69<br>29.1 (26.1)   |
| Total duration of use (days) <sup>a,b</sup> , mean (SD) | n=94<br>251.6 (1209.7)     | n=28<br>92.9 (239.5)        |
| <b>SCS use for NP only</b>                              |                            |                             |
| SCS, n/N (%)                                            | 17/233 (7.3)               | 11/233 (4.7)                |
| Number of SCS courses <sup>a</sup> , mean (SD)          | n=17<br>1.5 (0.7)          | n=11<br>2.3 (2.57)          |
| Total daily dose (mg) <sup>a</sup> , mean (SD)          | n doses=26<br>28.2 (10.3)  | n doses=25<br>27.1 (21.6)   |
| Total duration of use (days) <sup>a,b</sup> , mean (SD) | n=17<br>69.2 (178.4)       | n=11<br>96.5 (200.7)        |

**Notes:** Prior treatments are those which are started and stopped on or before the index date.

<sup>a</sup>Among those prescribed that medication; SCS doses presented as prednisone equivalents. <sup>b</sup>Includes days the patient was on SCS, regardless of dose.

**Abbreviations:** SCS, systemic corticosteroid; SD, standard deviation.

**Supplementary Table 4.** Change from baseline (12-month pre-index period) in total NPS following benralizumab initiation by subgroup<sup>a</sup>

|                                                   | Total NPS, mean (SD)                 |                             | Mean change from baseline in total NPS <sup>b</sup> (95% CI) |
|---------------------------------------------------|--------------------------------------|-----------------------------|--------------------------------------------------------------|
|                                                   | Baseline (12-month pre-index period) | Follow-up (up to 12 months) |                                                              |
| All patients                                      | n=91<br>3.8 (2.4)                    | n=63<br>3.0 (2.1)           | n=57<br>-1.2 (-1.7, -0.6)                                    |
| Patients with baseline total NPS <5               | n=56<br>2.3 (1.5)                    | n=33<br>2.2 (1.7)           | n=33<br>-0.4 (-0.9, 0.0)                                     |
| Patients with baseline total NPS ≥5               | n=35<br>6.3 (0.9)                    | n=24<br>4.1 (2.2)           | n=24<br>-2.2 (-3.2, -1.2)                                    |
| Patients with no baseline NP surgery <sup>c</sup> | n=75<br>3.9 (2.3)                    | n=53<br>3.3 (2.0)           | n=47<br>-1.0 (-1.5, -0.5)                                    |
| Patients with no NP surgery at any time pre-index | n=38<br>4.5 (2.0)                    | n=26<br>3.4 (1.9)           | n=25<br>-1.3 (-2.2, -0.4)                                    |
| Patients with NP surgery at any time pre-index    | n=50<br>3.3 (2.5)                    | n=35<br>2.8 (2.2)           | n=30<br>-1.0 (-1.8, -0.3)                                    |
| Baseline blood eosinophil count ≥300 cells/μL     | n=64<br>3.9 (2.1)                    | n=49<br>3.0 (1.9)           | n=45<br>-1.1 (-1.7, -0.6)                                    |

**Notes:** <sup>a</sup>Only subgroups with a minimum of 20 patients were assessed. <sup>b</sup>Changes from baseline were evaluated in the subset of patients who had both baseline and follow-up available data. <sup>c</sup>NP surgery within 12 months pre-index.

**Abbreviations:** CI, confidence interval; NP, nasal polyps; NPS, Nasal Polyp Score; SD, standard deviation.

**Supplementary Table 5.** Change from baseline (12-month pre-index period) in SNOT-22 total score following benralizumab initiation by subgroup<sup>a</sup>

|                                                   | SNOT-22 total score, mean (SD)       |                             | Mean change from baseline in SNOT-22 total score (95% CI) |
|---------------------------------------------------|--------------------------------------|-----------------------------|-----------------------------------------------------------|
|                                                   | Baseline (12-month pre-index period) | Follow-up (up to 12 months) |                                                           |
| All patients                                      | n=161<br>47.5 (22.6)                 | n=114<br>28.9 (21.1)        | n=105<br>-19.8 (-23.6, -15.9)                             |
| Patients with baseline SNOT-22 score <sup>b</sup> |                                      |                             |                                                           |
| 8–20 (mild)                                       | n=16<br>14.6 (3.7)                   | n=11<br>9.6 (9.1)           | n=11<br>-5.1 (-11.3, 1.1)                                 |
| >20–50 (moderate)                                 | n=59<br>37.4 (7.5)                   | n=38<br>24.3 (15.7)         | n=38<br>-13.2 (-18.2, -8.3)                               |
| ≤50 (mild/moderate)                               | n=75<br>32.5 (11.6)                  | n=49<br>21.0 (15.7)         | n=49<br>-11.4 (-15.5, -7.3)                               |
| >50 (severe)                                      | n=78<br>66.4 (12.2)                  | n=53<br>36.8 (21.3)         | n=53<br>-28.6 (-34.4, -22.8)                              |
| Patients with no baseline NP surgery <sup>c</sup> | n=139<br>48.4 (22.6)                 | n=104<br>28.9 (21.2)        | n=95<br>-20.4 (-24.4, -16.4)                              |
| Patients with no NP surgery at any time pre-index | n=69<br>49.7 (19.9)                  | n=52<br>28.0 (20.7)         | n=48<br>-21.2 (-27.1, -15.2)                              |
| Patients with NP surgery at any time pre-index    | n=86<br>46.3 (24.3)                  | n=59<br>28.9 (21.0)         | n=54<br>-20.1 (-25.2, -14.9)                              |
| Baseline blood eosinophil count ≥300 cells/μL     | n=118<br>51.1 (21.8)                 | n=92<br>28.8 (20.6)         | n=86<br>-21.5 (-25.7, -17.2)                              |

**Notes:** <sup>a</sup>Only subgroups with a minimum of 20 patients were assessed. <sup>b</sup>Eight patients with baseline SNOT-22 score <8 were excluded from all subgroups.

<sup>c</sup>NP surgery within 12 months pre-index.

**Abbreviations:** CI, confidence interval; NP, nasal polyps; SNOT-22, SinoNasal Outcome Test-22; SD, standard deviation.

**Supplementary Table 6.** Change from baseline (12-month pre-index period) in NPS and SNOT-22 score following benralizumab initiation by countries<sup>a</sup>

| Country | Measures                                                 | Baseline    | Follow-up            |
|---------|----------------------------------------------------------|-------------|----------------------|
|         |                                                          |             | (up-to 12 months)    |
| France  | <b>SNOT-22</b>                                           | n=27        | n=23                 |
|         | Total score, mean (SD)                                   | 49.9 (24.7) | 34.0 (22.6)          |
|         | Change from baseline <sup>b</sup> , mean (95% CI)        | N/A         | -14.5 (-20.4, -8.6)  |
|         | Percent with clinically significant improvement, n/N (%) | N/A         | 16/22 (72.7)         |
| Italy   | <b>SNOT-22</b>                                           | n=89        | n=61                 |
|         | Total score, mean (SD)                                   | 50.2 (21.3) | 27.7 (20.9)          |
|         | Change from baseline <sup>a</sup> , mean (95% CI)        | N/A         | -24.4 (-30.3, -18.6) |
|         | Percent with clinically significant improvement, n/N (%) | N/A         | 41/57 (71.9)         |
| Spain   | <b>Total NPS</b>                                         | n=33        | n=28                 |
|         | Total NPS, mean (SD)                                     | 4.4 (2.0)   | 3.3 (1.7)            |
|         | Change from baseline <sup>a</sup> , mean (95% CI)        | N/A         | -1.1 (-1.8, -0.4)    |
|         | Percent with clinically significant improvement, n/N (%) | N/A         | 13/23 (56.5)         |

**Notes:** <sup>a</sup>Only subgroups with a minimum of 20 patients were assessed. <sup>b</sup>Changes from baseline were evaluated in the subset of patients who had both baseline and follow-up available data.

**Abbreviations:** CI, confidence interval; N/A, not applicable; NP, nasal polyps; NPS, Nasal Polyp Score; SNOT-22, SinoNasal Outcome Test-22; SD, standard deviation.
